# Supplementary material for: Dendrimer mediated clustering of bacteria: improved aggregation and evaluation of bacterial response and viability
Source: Royal Society of Chemistry journal article supplement (doi:10.1039/c6bm00079g), 2016-01-01
Supplement: c6bm00079g1.pdf [file c6bm00079g1.pdf]

## Dendrimer mediated clustering of bacteria: Improved aggregation and evaluation of bacterial response and viability.

Emma Leire,<sup>a,b</sup> Sandra Amaral,<sup>a</sup> Iria Louzao,<sup>b,c</sup> Klaus Winzer,<sup>d</sup> Cameron Alexander,<sup>b,\*</sup> Eduardo Fernandez-Megia<sup>a,\*</sup> and Francisco Fernandez-Trillo<sup>e,\*</sup>

<sup>a</sup> Department of Organic Chemistry and Center for Research in Biological Chemistry and Molecular Materials (CIQUS), University of Santiago de Compostela, 15782 Santiago de Compostela, Spain. E-mail: [ef.megia@usc.es](mailto:ef.megia@usc.es)

<sup>b</sup> School of Pharmacy, The University of Nottingham, Nottingham NG7 2RD, UK. E-mail: [cameron.alexander@nottingham.ac.uk](mailto:cameron.alexander@nottingham.ac.uk)

<sup>c</sup> Additive Manufacturing and 3D Printing Research Group, University of Nottingham, Nottingham NG7 2RD, UK

<sup>d</sup> School of Molecular Medical Sciences, Centre for Biomolecular Sciences, The University of Nottingham, Nottingham NG7 2RD, UK

<sup>e</sup> School of Chemistry, University of Birmingham. B15 2TT, UK. E-mail: [f.fernandez-trillo@bham.ac.uk](mailto:f.fernandez-trillo@bham.ac.uk)

### Dendrimer Characterisation

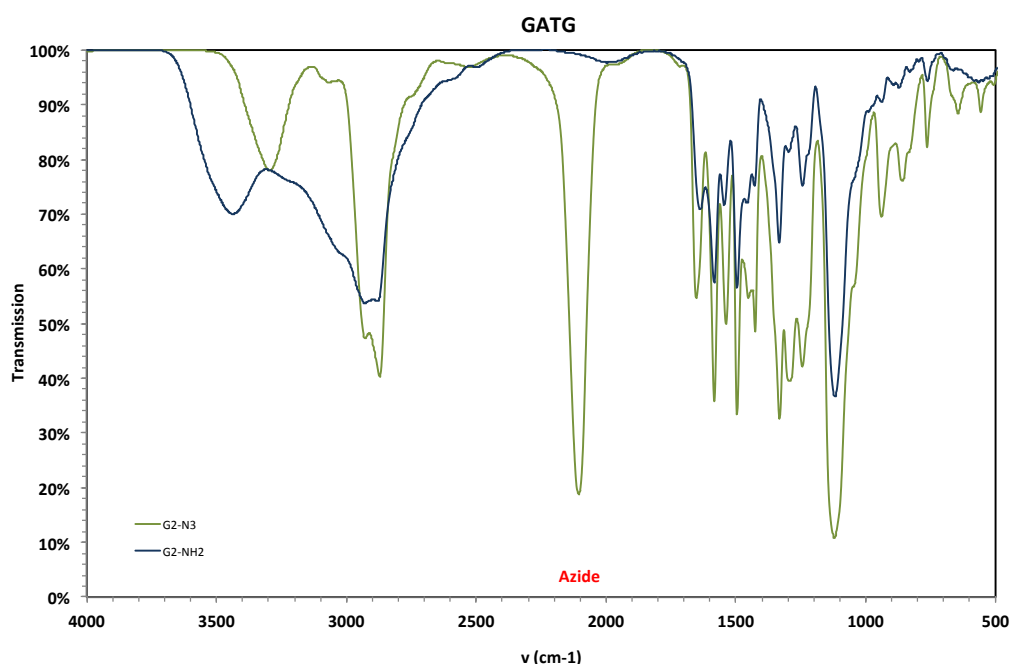

Figure S1: Representative monitoring of the synthesis of Gn-NH<sub>2</sub> and the disappearance of azide peak. IR spectra of G2-N<sub>3</sub> (green) and G2-NH<sub>2</sub> (blue).

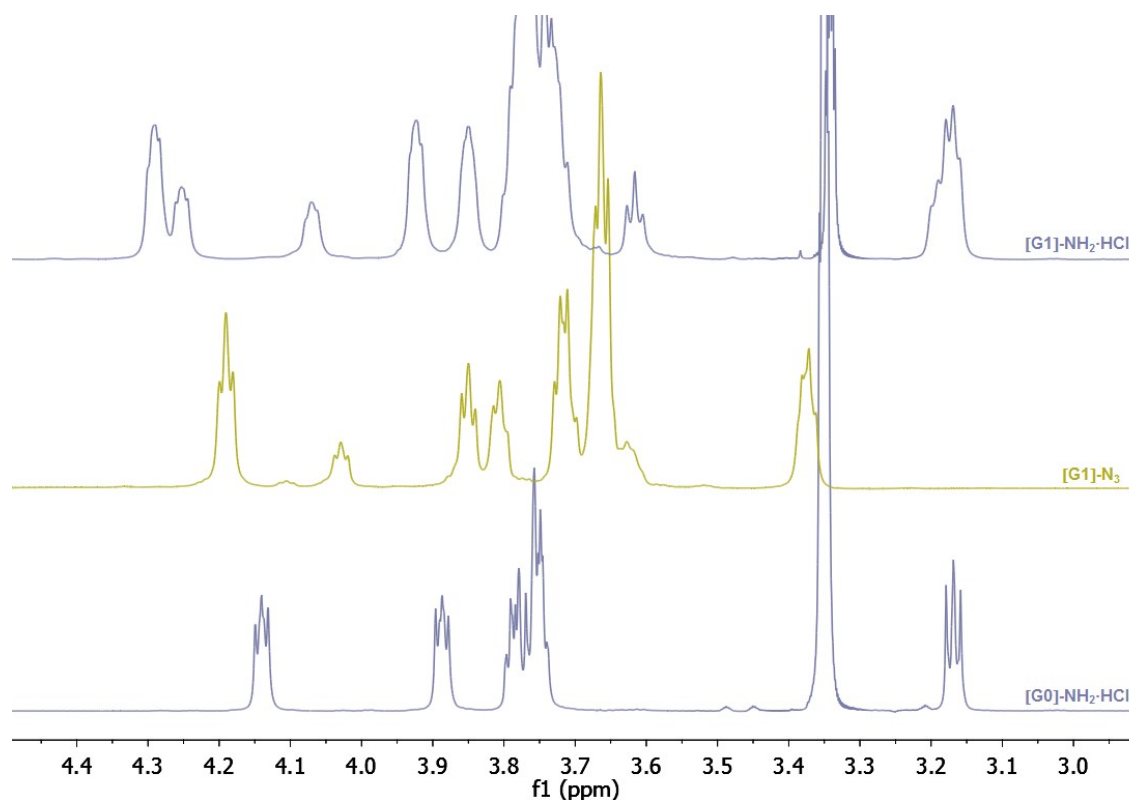

Figure S2: Representative monitoring of the synthesis of  $G_n-NH_2$ :  $^1H$ -NMR spectra of 1,3,5-tri(2-(2-(2-aminoethoxy)ethoxy)ethoxy)benzene ( $G_0-NH_2$ ),  $G_1-N_3$  and  $G_1-NH_2$ .  $^1H$ -NMR spectra for the  $G_1-N_3$  was performed in  $CDCl_3$  and  $G_0-NH_2$  and  $G_1-NH_2$  in  $CD_3OD$ .

### Size Exclusion Chromatography (SEC)

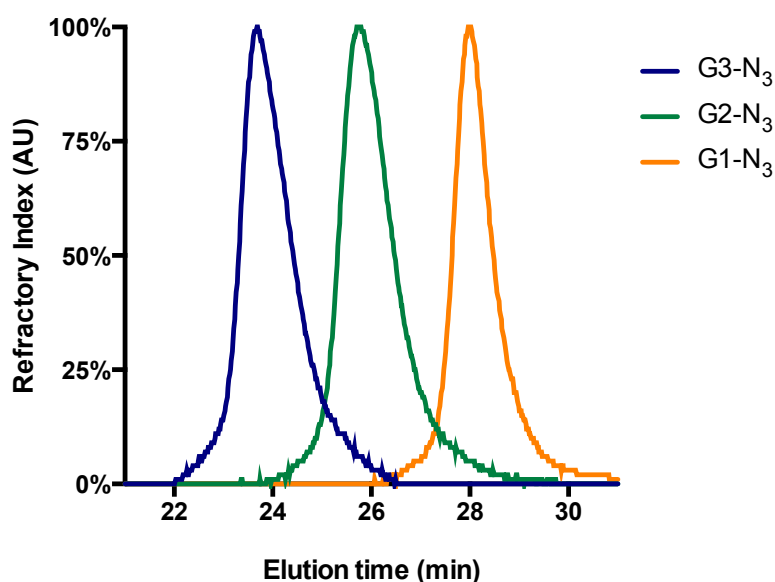

Figure S3: Normalised size exclusion chromatograms for GATG dendrimer  $G_1-N_3$  (orange),  $G_2-N_3$  (green) and  $G_3-N_3$  (blue). THF was used as an eluent at 1 mL/min. Samples were filtered through a  $0.45\ \mu m$  filter before injection.

| Gn-NH <sub>2</sub> | Amines | Mw / Da | Size / nm   | ζ / mV      |
|--------------------|--------|---------|-------------|-------------|
| G1-NH <sub>2</sub> | 9      | 2389    | -           | -           |
| G2-NH <sub>2</sub> | 27     | 7765    | 3.62 ± 0.42 | 30.6 ± 2.46 |
| G3-NH <sub>2</sub> | 81     | 23891   | 5.68 ± 0.39 | 48.2 ± 4.75 |

Table S1: Number of surface amines, theoretical molecular weight, experimental size (as determined by DLS at 25 °C with hydrochloride amino dendrimers (1.5 mg/mL) in a 10 mM NaH<sub>2</sub>PO<sub>4</sub> 10% HCl 0.1M solution) and ζ-potential (as determined with hydrochloride amino dendrimers (10 mg/mL) in milliQ water).

### Clustering of *Vibrio harveyi*

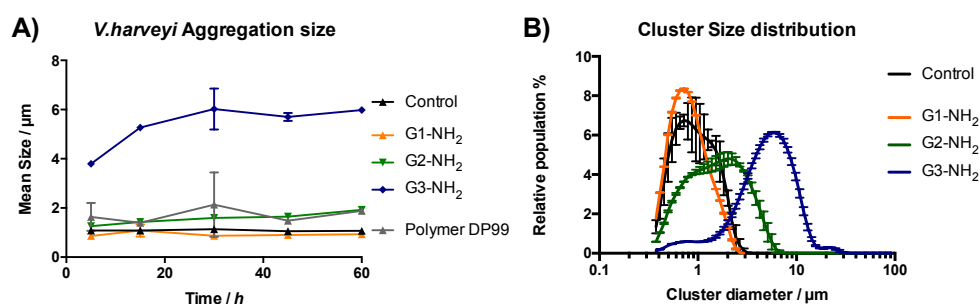

Figure S4: A) Mean cluster size of *V. harveyi* BB170 in the absence (black) and presence of G1-NH<sub>2</sub> (orange), G2-NH<sub>2</sub> (green), G3-NH<sub>2</sub> (blue) and p(DMAPMAM) DP 99 (grey). B) Size distribution of *V. harveyi*'s clusters in the absence (black) and presence of G1-NH<sub>2</sub> (orange), G2-NH<sub>2</sub> (green) and G3-NH<sub>2</sub> (blue). Initial OD<sub>600</sub> = 1, [NH<sub>2</sub>] = 0.33 mM in PBS at pH 7.4

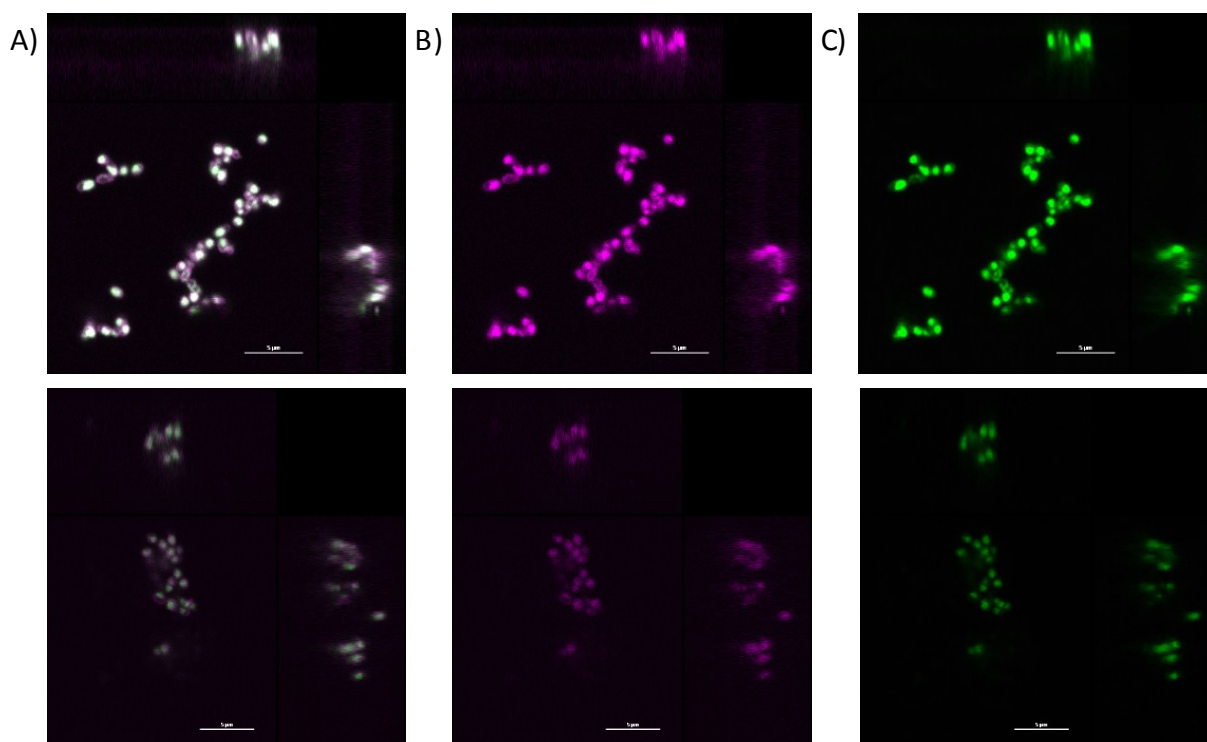

Figure S5: Confocal Laser Scanning Micrographs of *V. harveyi* BB170 (green) in the presence of MCCA labelled G3-NH<sub>2</sub> (magenta). A) Ortho projections from the overlaid magenta and green channels (white) including Z-stacks with transmission micrograph. B) Ortho projections for the blue channel and C) green channel with transmission micrograph. In all cases, the blue channel has been depicted magenta for clarity.

### $\zeta$ -potential of *V. harveyi*

A single colony of *V. harveyi* from LB agar plates was used to inoculate 2 mL of LB medium containing 50  $\mu\text{g/mL}$  kanamycin and incubated overnight at 30 °C. Bacteria were centrifuged at 9,000 rpm for 5 min at 4 °C, the supernatant was discarded and bacteria re-suspended in PBS. This washing step was repeated two times and bacteria were finally re-suspended at an  $\text{OD}_{600} = 1.0$ . Aliquots of the bacteria culture were mixed with known volumes of stock solutions of  $\text{Gn-NH}_2$  in PBS pH 7.4. The mixture was incubated for 1 h at room temperature. The dendrimer-bacteria mixture was centrifuged at 9000 rpm for 5 min and sample was resuspended in water prior to measurement. The values of the concentrations reported corresponds to the final  $\text{NH}_2$  concentration (mM) on dendrimers in the bacteria-suspension.

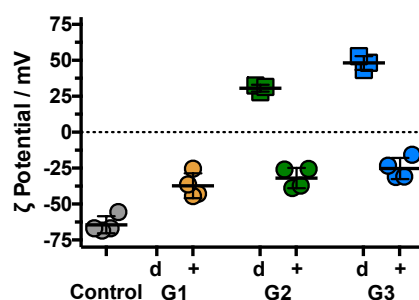

Figure S6:  $\zeta$ -potential for  $\text{Gn-NH}_2$  dendrimers (squares,  $[\text{Gn-NH}_2]=1.5 \text{ mg/mL}$ ); and for *V. harveyi* BB170 (circles) in the absence (control) and presence of G1- $\text{NH}_2$  (orange), G2- $\text{NH}_2$  (green) and G3- $\text{NH}_2$  (blue). (Initial  $\text{OD}_{600} = 1$ ,  $[\text{NH}_2] = 1.64 \text{ mM}$  in water.  $\zeta$ -potential of the dendrimers taken from Table S1.

### Membrane permeability and viability

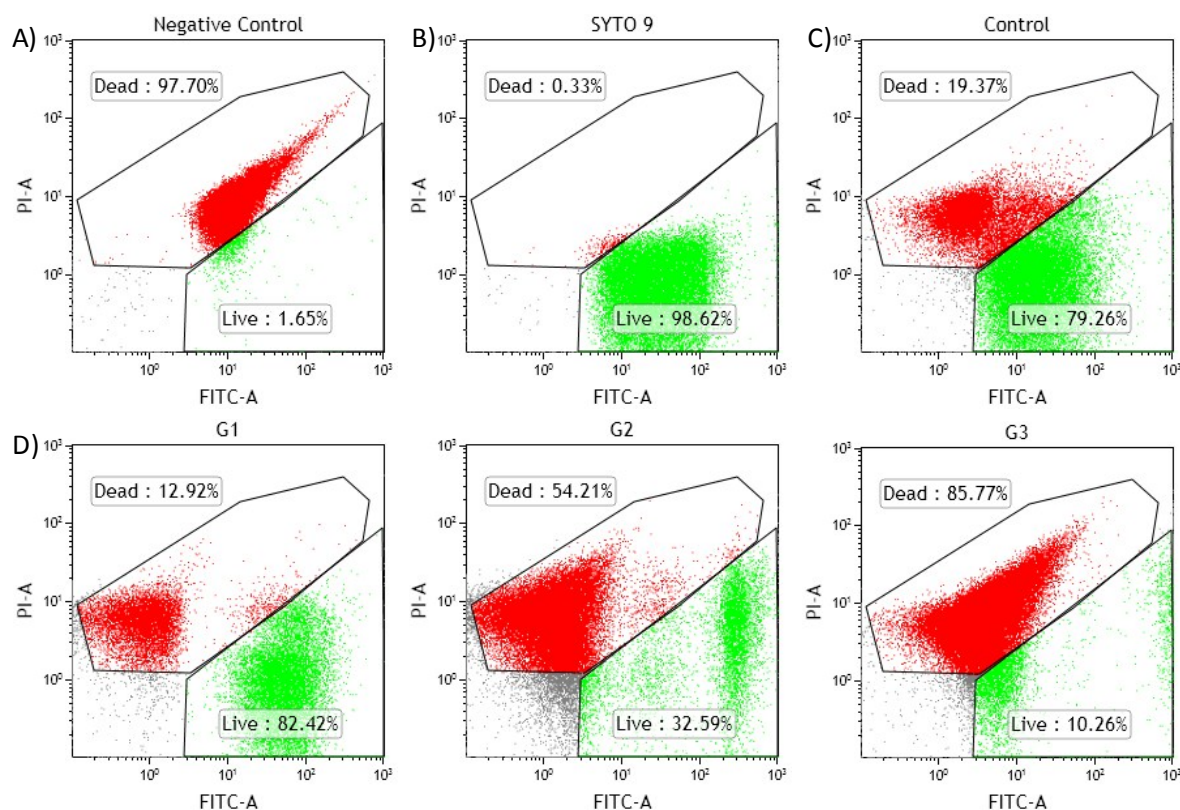

Figure S7: Flow cytometry of *V. harveyi* BB170 stained with propidium iodide (PI, red staining) and SYTO-9 (green staining). Red fluorescence was recorded on the PI channel (PI-A on y-axis) and green fluorescence on the FITC channel (FITC-A on x-axis). Gated population of *V. harveyi* BB170 based on calibration with A) bacteria treated with *i*-PrOH as a negative control

and stained with PI and SYTO-9 and B) non-treated bacteria stained with only SYTO-9 staining. C) Gated population of *V. harveyi* stained with PI and SYTO-9 in the absence (Control) and D) presence of Gn-NH<sub>2</sub> dendrimers for 1h at room temperature. Initial OD<sub>600</sub> = 1, [NH<sub>2</sub>] = 1.64 mM in PBS at pH 7.4. Values account for percentage of total number of counted cells.

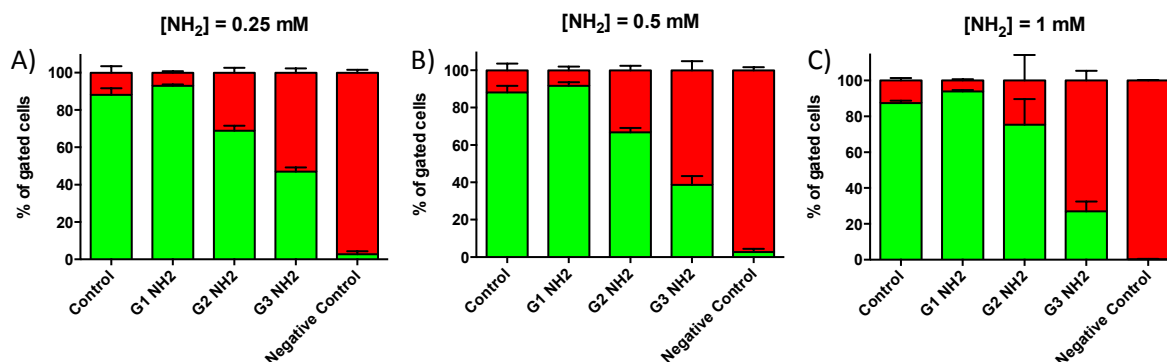

Figure S8: Normalized population of *V. harveyi* BB170 presented as the percentage of green and red cells. *V. harveyi* was incubated in the absence (control) and presence of Gn-NH<sub>2</sub>. Bacteria were treated with *i*-PrOH as a negative control. Initial OD<sub>600</sub> = 1. Bacteria diluted 5,000 fold in AB medium prior to incubation with Gn-NH<sub>2</sub>. Final [NH<sub>2</sub>] = 0.25 mM (A), 0.5 mM (B) and 1 mM (C).

## Luminescence

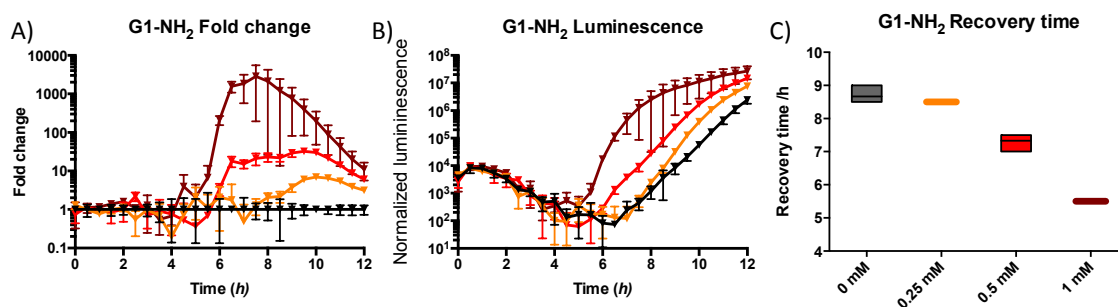

Figure S9: Luminescence of *V. harveyi* BB170 in the absence (black) and presence of G1-NH<sub>2</sub>: [NH<sub>2</sub>] = 0.25 mM (orange), 0.5 mM (red) and 1 mM (dark red). A) Fold increase of luminescence, B) normalised luminescence and C) recovery time.

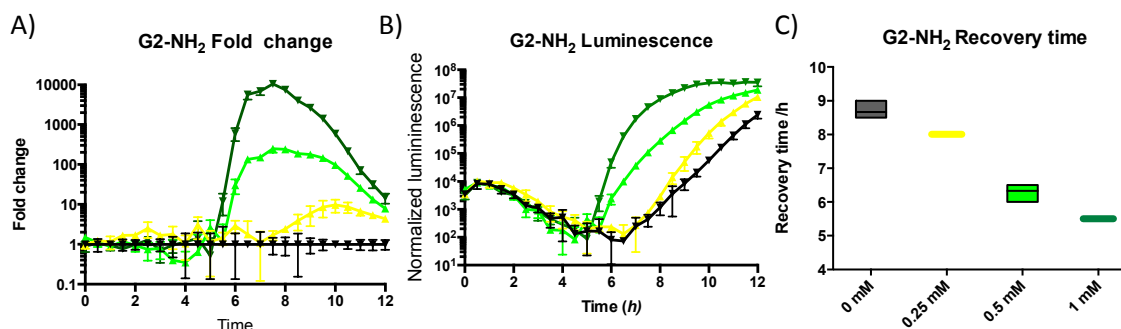

Figure S10: Luminescence of *V. harveyi* BB170 in the absence (black) and presence of G2-NH<sub>2</sub>: [NH<sub>2</sub>] = 0.25 mM (yellow), 0.5 mM (light green) and 1 mM (dark green). A) Fold increase of luminescence, B) normalised luminescence and C) recovery time.

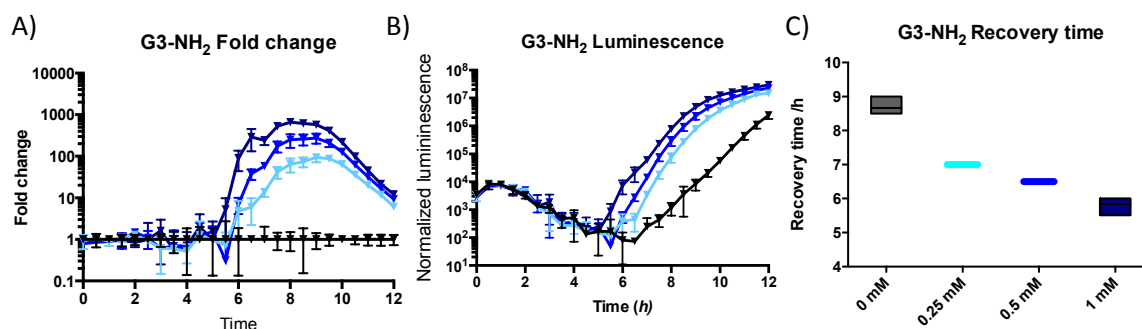

Figure S11: Luminescence of *V. harveyi* BB170 in the absence (black) and presence of G3-NH<sub>2</sub>: [NH<sub>2</sub>] = 0.25 mM (light blue), 0.5 mM (blue) and 1 mM (dark blue). A) Fold increase of luminescence, B) normalised luminescence and C) recovery time.

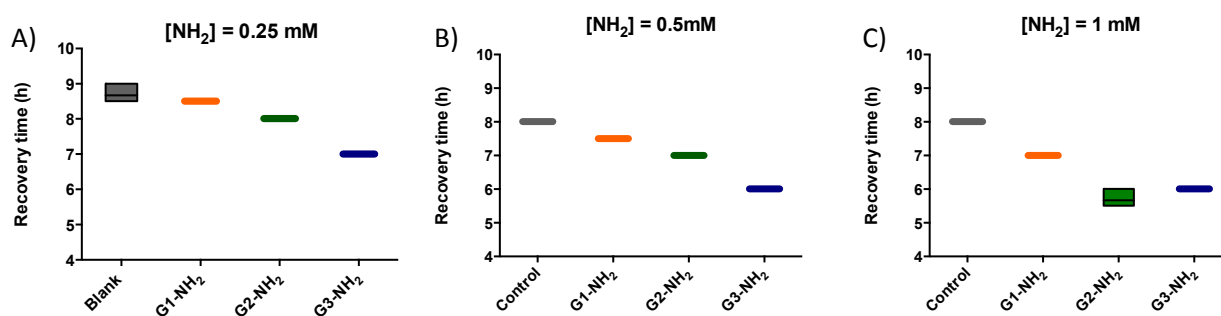

Figure S12: Representative generation dependent reduction (3 experiments) in the recovery time for Gn-NH<sub>2</sub> at 0.25 mM (A), 0.5 mM (B) and 1 mM (C).

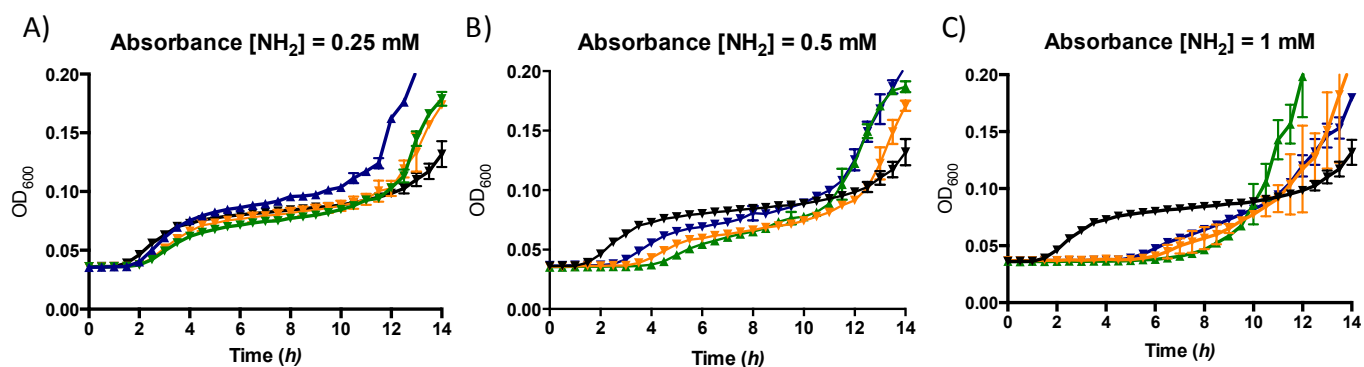

Figure S13: OD<sub>600</sub> of *V. harveyi* BB170 in the absence (black) and presence of G1-NH<sub>2</sub> (orange), G2-NH<sub>2</sub> (green) and G3-NH<sub>2</sub> (blue) at [NH<sub>2</sub>] = 0.25 mM (A), 0.5 mM (B) and 1 mM (C).

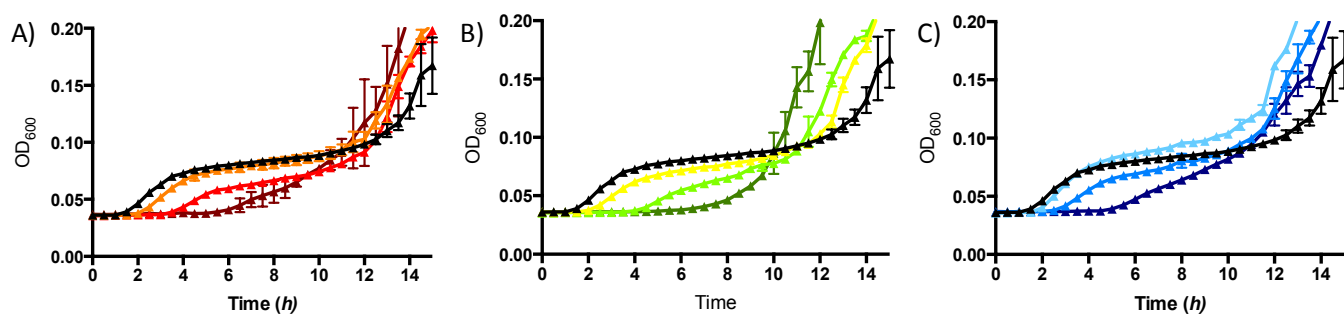

Figure S14: OD<sub>600</sub> of *V. harveyi* BB170 in the absence (black) and presence of G1-NH<sub>2</sub> (A): [NH<sub>2</sub>] = 0.25 mM (orange), 0.5 mM (red) and 1 mM (dark red); G2-NH<sub>2</sub> (B): [NH<sub>2</sub>] = 0.25 mM (yellow), 0.5 mM (light green) and 1 mM (dark green); and G3-NH<sub>2</sub> (C): [NH<sub>2</sub>] = 0.25 mM (light blue), 0.5 mM (blue) and 1 mM (dark blue).
